# Supplementary material for: RNA-Seq Based Transcriptome Analysis of the Type I Interferon Host Response upon Vaccinia Virus Infection of Mouse Cells
Source: Hindawi journal article supplement (doi:10.1155/2017/5157626), 2017-01-01
Supplement: f1 [file 5157626.f1.pdf]

**Table S1. Primers sequence used in qPCR analyses.**

| <b>Gene</b>   | <b>Gene description</b>                    | <b>Forward (5´ - 3´)</b> | <b>Reverse (5´ - 3´)</b>   |
|---------------|--------------------------------------------|--------------------------|----------------------------|
| <b>APOL9a</b> | Apolipoprotein 9a                          | cagtggatacctgtatagcctgg  | tctgcctctgtctgctatgg       |
| <b>b-ACT</b>  | b-actin                                    | ctaaggccaaccgtgaaaag     | accagaggcatacagggaca       |
| <b>DBF4</b>   | DBF4-type zinc finger-containing protein 1 | tatggacggcgataaatgtg     | tcgagatcttctgtatttctgtaagc |
| <b>L5R</b>    | Vaccinia virus WR092 gene                  | ccatggatgacaactcaaaca    | tcatctgcgaagaacatcgt       |
| <b>A8R</b>    | Vaccinia virus WR127 gene                  | gatgcggttgacgctgtaaaa    | tgcatccttttgatgcgata       |
| <b>GAPDH</b>  | Glyceraldehyde-3-phosphate dehydrogenase   | ctcccactctccaccttcg      | cataccaggaaatgagcttgacaa   |
| <b>IRF9</b>   | Interferon regulatory factor 9             | cagcaactgcaactctgagc     | actcggccacatagatgaa        |
| <b>MRPL2</b>  | Mitochondrial ribosomal protein L2         | gagcaatgtcctccttcagc     | tcttccaggacacaaacttg       |
| <b>OAS1a</b>  | 2'-5'-oligoadenylate synthetase 1          | agcggaaacttctgaagcag     | caggcaaagacagtgagcaa       |

**Table S2. Significant differentially expressed genes after IFN induction.**

| Gene symbol | Mock FPKM | IFN FPKM | log <sub>2</sub> (FC) | p-value  | Description                                                                                        |
|-------------|-----------|----------|-----------------------|----------|----------------------------------------------------------------------------------------------------|
| Mx2         | 0         | 1,42489  | Inf                   | 5,00E-05 | myxovirus (influenza virus) resistance 2 [Source:MGI Symbol;Acc:MGI:97244]                         |
| Rtp4        | 0,224564  | 19,468   | 6,44                  | 5,00E-05 | receptor transporter protein 4 [Source:MGI Symbol;Acc:MGI:1915025]                                 |
| Ddx58       | 0,3487    | 20,9985  | 5,91                  | 5,00E-05 | DEAD (Asp-Glu-Ala-Asp) box polypeptide 58 [Source:MGI Symbol;Acc:MGI:2442858]                      |
| Xaf1        | 0,221216  | 11,3076  | 5,68                  | 5,00E-05 | XIAP associated factor 1 [Source:MGI Symbol;Acc:MGI:3772572]                                       |
| Igtp        | 0,119031  | 4,99169  | 5,39                  | 0,00015  | interferon gamma induced GTPase [Source:MGI Symbol;Acc:MGI:107729]                                 |
| Oas1        | 0,317158  | 13,1148  | 5,37                  | 5,00E-05 | 2'-5' oligoadenylate synthetase-like 1 [Source:MGI Symbol;Acc:MGI:2180849]                         |
| Oas1b       | 0,139622  | 4,96127  | 5,15                  | 5,00E-05 | 2'-5' oligoadenylate synthetase 1B [Source:MGI Symbol;Acc:MGI:97430]                               |
| Isg15       | 0,578739  | 17,5302  | 4,92                  | 5,00E-05 | ISG15 ubiquitin-like modifier [Source:MGI Symbol;Acc:MGI:1855694]                                  |
| Rhod        | 18,0381   | 345,836  | 4,26                  | 5,00E-05 | ras homolog gene family, member D [Source:MGI Symbol;Acc:MGI:108446]                               |
| Parp14      | 0,0977489 | 1,71159  | 4,13                  | 5,00E-05 | poly (ADP-ribose) polymerase family, member 14 [Source:MGI Symbol;Acc:MGI:1919489]                 |
| Trim21      | 0,430314  | 6,05298  | 3,81                  | 5,00E-05 | tripartite motif-containing 21 [Source:MGI Symbol;Acc:MGI:106657]                                  |
| Apol9a      | 2,08982   | 26,6401  | 3,67                  | 5,00E-05 | apolipoprotein L 9a [Source:MGI Symbol;Acc:MGI:3606001]                                            |
| Oas1g       | 0,776779  | 8,88173  | 3,52                  | 5,00E-05 | 2'-5' oligoadenylate synthetase 1G [Source:MGI Symbol;Acc:MGI:97429]                               |
| Helz2       | 2,50527   | 23,8868  | 3,25                  | 5,00E-05 | helicase with zinc finger 2, transcriptional coactivator [Source:MGI Symbol;Acc:MGI:2385169]       |
| Slfm2       | 0,252734  | 1,98815  | 2,98                  | 0,00015  | schlafen 2 [Source:MGI Symbol;Acc:MGI:1313258]                                                     |
| Oas1a       | 1,41434   | 10,2379  | 2,86                  | 5,00E-05 | 2'-5' oligoadenylate synthetase 1A [Source:MGI Symbol;Acc:MGI:2180860]                             |
| Apol9b      | 2,66209   | 18,551   | 2,80                  | 5,00E-05 | apolipoprotein L 9b [Source:MGI Symbol;Acc:MGI:1919148]                                            |
| Trim30a     | 1,07502   | 7,16009  | 2,74                  | 5,00E-05 | tripartite motif-containing 30A [Source:MGI Symbol;Acc:MGI:98178]                                  |
| Samd9l      | 1,47019   | 9,24891  | 2,65                  | 5,00E-05 | sterile alpha motif domain containing 9-like [Source:MGI Symbol;Acc:MGI:1343184]                   |
| Slfm5       | 0,36026   | 2,24497  | 2,64                  | 5,00E-05 | schlafen 5 [Source:MGI Symbol;Acc:MGI:1329004]                                                     |
| Irgm1       | 7,42535   | 46,0772  | 2,63                  | 5,00E-05 | immunity-related GTPase family M member 1 [Source:MGI Symbol;Acc:MGI:107567]                       |
| Parp12      | 0,493812  | 2,73206  | 2,47                  | 5,00E-05 | poly (ADP-ribose) polymerase family, member 12 [Source:MGI Symbol;Acc:MGI:2143990]                 |
| Irf9        | 6,37807   | 33,2275  | 2,38                  | 5,00E-05 | interferon regulatory factor 9 [Source:MGI Symbol;Acc:MGI:107587]                                  |
| Rnf213      | 5,66188   | 26,3644  | 2,22                  | 5,00E-05 | ring finger protein 213 [Source:MGI Symbol;Acc:MGI:1289196]                                        |
| Stat2       | 2,5659    | 11,7023  | 2,19                  | 5,00E-05 | signal transducer and activator of transcription 2 [Source:MGI Symbol;Acc:MGI:103039]              |
| Tor3a       | 10,1315   | 36,1723  | 1,84                  | 5,00E-05 | torsin family 3, member A [Source:MGI Symbol;Acc:MGI:1353652]                                      |
| H2-Q1       | 3,41199   | 11,8566  | 1,80                  | 5,00E-05 | histocompatibility 2, Q region locus 1 [Source:MGI Symbol;Acc:MGI:95928]                           |
| Il15        | 2,12905   | 6,78449  | 1,67                  | 5,00E-05 | interleukin 15 [Source:MGI Symbol;Acc:MGI:103014]                                                  |
| Stat1       | 2,63919   | 8,31407  | 1,66                  | 5,00E-05 | signal transducer and activator of transcription 1 [Source:MGI Symbol;Acc:MGI:103063]              |
| Ifi35       | 3,66682   | 11,2891  | 1,62                  | 5,00E-05 | interferon-induced protein 35 [Source:MGI Symbol;Acc:MGI:1917360]                                  |
| Eif2ak2     | 7,79477   | 22,6396  | 1,54                  | 5,00E-05 | eukaryotic translation initiation factor 2-alpha kinase 2 [Source:MGI Symbol;Acc:MGI:1353449]      |
| Kcne4       | 3,37498   | 8,97622  | 1,41                  | 5,00E-05 | potassium voltage-gated channel, Isk-related subfamily, gene 4 [Source:MGI Symbol;Acc:MGI:1891125] |
| Lgals3bp    | 31,7365   | 81,3106  | 1,36                  | 5,00E-05 | lectin, galactoside-binding, soluble, 3 binding protein [Source:MGI Symbol;Acc:MGI:99554]          |
| Bst2        | 12,9175   | 32,3267  | 1,32                  | 5,00E-05 | bone marrow stromal cell antigen 2 [Source:MGI Symbol;Acc:MGI:1916800]                             |
| Egr1        | 3,44869   | 8,61428  | 1,32                  | 5,00E-05 | early growth response 1 [Source:MGI Symbol;Acc:MGI:95295]                                          |
| Ifi27       | 41,3458   | 102,436  | 1,31                  | 5,00E-05 | interferon, alpha-inducible protein 27 [Source:MGI Symbol;Acc:MGI:1277180]                         |
| Pnpla6      | 6,39246   | 14,3499  | 1,17                  | 5,00E-05 | patatin-like phospholipase domain containing 6 [Source:MGI Symbol;Acc:MGI:1354723]                 |
| Trim25      | 13,252    | 29,4216  | 1,15                  | 5,00E-05 | tripartite motif-containing 25 [Source:MGI Symbol;Acc:MGI:102749]                                  |
| Ifitm3      | 168,338   | 362,716  | 1,11                  | 5,00E-05 | interferon induced transmembrane protein 3 [Source:MGI Symbol;Acc:MGI:1913391]                     |
| Mrgprf      | 12,0076   | 25,4772  | 1,09                  | 5,00E-05 | MAS-related GPR, member F [Source:MGI Symbol;Acc:MGI:2384823]                                      |
| Ier3        | 50,7915   | 102,292  | 1,01                  | 5,00E-05 | immediate early response 3 [Source:MGI Symbol;Acc:MGI:104814]                                      |
| Akr1b3      | 351,422   | 700,47   | 1,00                  | 5,00E-05 | aldo-keto reductase family 1, member B3 (aldose reductase) [Source:MGI Symbol;Acc:MGI:1353494]     |
| Wdr43       | 93,5366   | 49,7774  | -0,91                 | 1,00E-04 | WD repeat domain 43 [Source:MGI Symbol;Acc:MGI:1919765]                                            |
| Cd3eap      | 35,5701   | 17,7292  | -1,00                 | 0,00015  | CD3E antigen, epsilon polypeptide associated protein [Source:MGI Symbol;Acc:MGI:1917583]           |
| Ubc         | 299,551   | 138,413  | -1,11                 | 5,00E-05 | ubiquitin C [Source:MGI Symbol;Acc:MGI:98889]                                                      |
| Rps19-ps2   | 5,09322   | 0        | -Inf                  | 5,00E-05 | ribosomal protein S19, pseudogene 2 [Source:MGI Symbol;Acc:MGI:3647073]                            |

**Table S3. VACV gene expression after infection with UV-inactivated VACV.**

| VACV WR gene | FPKM <sup>(1)</sup> | Temporal Expression <sup>(2)</sup> | VACV WR gene | FPKM <sup>(1)</sup> | Temporal Expression <sup>(2)</sup> |
|--------------|---------------------|------------------------------------|--------------|---------------------|------------------------------------|
| 196          | 448,453             | E1.2                               | 043          | 27,483              | E1.2                               |
| 089          | 334,426             | E1.1                               | 061          | 26,18               | E1.1                               |
| 158          | 257,419             | E1.1                               | 173          | 26,1105             | E1.2                               |
| 053          | 250,594             | E1.1                               | 054          | 24,4903             | E1.1                               |
| 038          | 228,898             | E1.1                               | 191          | 24,1053             | PR                                 |
| 059          | 176,753             | E1.1                               | 201          | 23,857              | E1.2                               |
| 184          | 154,072             | E1.2                               | 127          | 23,538              | E1.1                               |
| 160          | 149,1               | E1.1                               | 170          | 23,3367             | E1.2                               |
| 034          | 117,086             | E1.1                               | 195          | 23,0083             | E1.1                               |
| 083          | 108,275             | E1.2                               | 165          | 21,6519             | E1.2                               |
| 041          | 107,406             | E1.2                               | 117          | 20,2527             | E1.2                               |
| 032          | 90,2349             | E1.1                               | 028          | 18,7823             | E1.2                               |
| 112          | 86,678              | E1.2                               | 023          | 18,4036             | E1.2                               |
| 047          | 84,7748             | E1.2                               | 152          | 16,1524             | E1.2                               |
| 029          | 82,5136             | E1.1                               | 109          | 15,664              | E1.2                               |
| 156          | 63,8192             | E1.1                               | 060          | 15,6077             | E1.1                               |
| 172          | 63,774              | E1.1                               | 068          | 15,4175             | E1.1                               |
| 169          | 62,592              | E1.2                               | 183          | 15,0487             | E1.2                               |
| 190          | 60,2621             | E1.1                               | 024          | 13,6144             | E1.2                               |
| 031          | 57,8544             | E1.2                               | 177          | 13,4575             | E1.1                               |
| 200          | 56,199              | E1.1                               | 045          | 13,4289             | E1.2                               |
| 154          | 53,0669             | E1.2                               | 181          | 12,5421             | E1.2                               |
| 050          | 52,7462             | E1.1                               | 175          | 12,2789             | E1.2                               |
| 188          | 44,3952             | E1.2                               | 030          | 12,2445             | E1.2                               |
| 094          | 43,4401             | E1.2                               | 143          | 12,0635             | E1.2                               |
| 022          | 41,9533             | E1.1                               | 044          | 11,964              | E1.2                               |
| 072          | 40,2754             | E1.1                               | 202          | 10,018              | E1.2                               |
| 046          | 39,0076             | E1.2                               | 137          | 9,63951             | PR                                 |
| 039          | 36,1997             | E1.1                               | 055          | 8,78575             | E1.2                               |
| 021          | 35,4091             | E1.2                               | 114          | 8,30566             | E1.1                               |
| 103          | 35,3938             | E1.1                               | 178          | 8,12113             | E1.2                               |
| 194          | 33,5508             | E1.1                               | 040          | 7,61685             | E1.2                               |
| 193          | 33,394              | E1.2                               | 042          | 7,22993             | E1.2                               |
| 174          | 33,2188             | E1.1                               | 095          | 7,20461             | E1.2                               |
| 124          | 32,9562             | E1.2                               | 051          | 7,12493             | E1.2                               |
| 159          | 29,7016             | E1.1                               | 110          | 6,78521             | E1.2                               |
| 037          | 28,6559             | E1.1                               |              |                     |                                    |

(1) FPKM, Fragments Per Kilobase Of Exon Per Million Fragments Mapped.

(2) **Temporal expression according to Yang Z., et al.** E1.1=Early subcluster 1, E1.2=Early subcluster 2 and PR=Post replicative.

**Table S4. Significant differentially expressed host genes after infection with inactivated VACV.**

| Gene symbol | Mock FPKM | PLWUV_VACV FPKM | log2(FC)  | p-value  | Description                                                                                                                                                        |
|-------------|-----------|-----------------|-----------|----------|--------------------------------------------------------------------------------------------------------------------------------------------------------------------|
| Pou5f1      | 0         | 0,387441        | Inf       | 4,00E-04 | POU domain, class 5, transcription factor 1 [Source:MGI Symbol;Acc:MGI:101893]                                                                                     |
| Ccl5        | 0         | 0,525911        | Inf       | 5,00E-05 | chemokine (C-C motif) ligand 5 [Source:MGI Symbol;Acc:MGI:98262]                                                                                                   |
| Fosb        | 1,358     | 7,22105         | 2,41073   | 5,00E-05 | FBJ osteosarcoma oncogene B [Source:MGI Symbol;Acc:MGI:95575]                                                                                                      |
| H3f3a-ps2   | 4,32726   | 21,1427         | 2,28864   | 3,00E-04 | H3 histone, family 3A, pseudogene 2 [Source:MGI Symbol;Acc:MGI:1101758]                                                                                            |
| Rnaset2b    | 0,584778  | 2,37846         | 2,02407   | 3,00E-04 | ribonuclease T2B [Source:MGI Symbol;Acc:MGI:3702087]                                                                                                               |
| Pgk1-rs7    | 1,58989   | 6,32818         | 1,99286   | 5,00E-05 | phosphoglycerate kinase-1, related sequence-7 [Source:MGI Symbol;Acc:MGI:97562]                                                                                    |
| Gm11808     | 44,2146   | 156,197         | 1,82077   | 5,00E-05 | predicted gene 11808 [Source:MGI Symbol;Acc:MGI:3649356]                                                                                                           |
| Apbb2       | 19,4623   | 67,1926         | 1,78762   | 1,00E-04 | amyloid beta (A4) precursor protein-binding, family B, member 2 [Source:MGI Symbol;Acc:MGI:108405]                                                                 |
| Gm13826     | 32,051    | 108,813         | 1,76341   | 2,00E-04 | predicted gene 13826 [Source:MGI Symbol;Acc:MGI:3651519]                                                                                                           |
| H2-Q1       | 3,37993   | 11,42           | 1,7565    | 5,00E-05 | histocompatibility 2, Q region locus 1 [Source:MGI Symbol;Acc:MGI:95928]                                                                                           |
| Rps13-ps2   | 10,7971   | 33,9251         | 1,65171   | 5,00E-05 | ribosomal protein S13, pseudogene 2 [Source:MGI Symbol;Acc:MGI:3704295]                                                                                            |
| Gm2000      | 13,7296   | 40,6802         | 1,56704   | 0,00015  | predicted gene 2000 [Source:MGI Symbol;Acc:MGI:3780170]                                                                                                            |
| Gm10288     | 21,5221   | 62,0438         | 1,52747   | 5,00E-05 | predicted gene 10288 [Source:MGI Symbol;Acc:MGI:3704227]                                                                                                           |
| Gm12918     | 22,5483   | 58,528          | 1,37611   | 1,00E-04 | predicted gene 12918 [Source:MGI Symbol;Acc:MGI:3652005]                                                                                                           |
| Tpt1-ps3    | 50,9163   | 120,877         | 1,24734   | 5,00E-05 | tumor protein, translationally-controlled, pseudogene 3 [Source:MGI Symbol;Acc:MGI:2664997]                                                                        |
| Rps23-ps    | 45,0603   | 105,712         | 1,23021   | 5,00E-05 | ribosomal protein S23, pseudogene [Source:MGI Symbol;Acc:MGI:3705429]                                                                                              |
| Serpine1    | 97,491    | 228,655         | 1,22983   | 5,00E-05 | serine (or cysteine) peptidase inhibitor, clade E, member 1 [Source:MGI Symbol;Acc:MGI:97608]                                                                      |
| Rps6-ps4    | 31,1679   | 72,6403         | 1,22071   | 5,00E-05 | ribosomal protein S6, pseudogene 4 [Source:MGI Symbol;Acc:MGI:3650907]                                                                                             |
| Dusp5       | 9,01692   | 20,1282         | 1,15851   | 5,00E-05 | dual specificity phosphatase 5 [Source:MGI Symbol;Acc:MGI:2685183]                                                                                                 |
| Spsb1       | 6,66087   | 13,6779         | 1,03806   | 0,00035  | sp1A/ryanodine receptor domain and SOCS box containing 1 [Source:MGI Symbol;Acc:MGI:1921896]                                                                       |
| Klf16       | 13,4366   | 26,9624         | 1,00478   | 0,00015  | Kruppel-like factor 16 [Source:MGI Symbol;Acc:MGI:2153049]                                                                                                         |
| Mid1        | 42,8261   | 84,6937         | 0,983766  | 2,00E-04 | midline 1 [Source:MGI Symbol;Acc:MGI:1100537]                                                                                                                      |
| Hmxo1       | 41,1287   | 75,07           | 0,868091  | 0,00055  | heme oxygenase (decycling) 1 [Source:MGI Symbol;Acc:MGI:96163]                                                                                                     |
| Mif         | 764,154   | 422,391         | -0,855282 | 0,00025  | macrophage migration inhibitory factor [Source:MGI Symbol;Acc:MGI:96982]                                                                                           |
| Sod3        | 59,645    | 31,9188         | -0,901998 | 0,00015  | superoxide dismutase 3, extracellular [Source:MGI Symbol;Acc:MGI:103181]                                                                                           |
| Cxcl1       | 46,1628   | 23,8182         | -0,954665 | 0,00055  | chemokine (C-X-C motif) ligand 1 [Source:MGI Symbol;Acc:MGI:108068]                                                                                                |
| Mt1         | 1080,16   | 546,469         | -0,983029 | 5,00E-05 | metallothionein 1 [Source:MGI Symbol;Acc:MGI:97171]                                                                                                                |
| Rplp1       | 4572,05   | 2272,58         | -1,00851  | 5,00E-05 | ribosomal protein, large, P1 [Source:MGI Symbol;Acc:MGI:1927099]                                                                                                   |
| Shfm1       | 109,21    | 52,556          | -1,05517  | 5,00E-05 | split hand/foot malformation (ectrodactyly) type 1 [Source:MGI Symbol;Acc:MGI:109238]                                                                              |
| H2afj       | 16,3602   | 7,8444          | -1,06045  | 5,00E-04 | H2A histone family, member J [Source:MGI Symbol;Acc:MGI:3606192]                                                                                                   |
| Akr1b3      | 348,17    | 163,409         | -1,0913   | 5,00E-05 | aldo-keto reductase family 1, member B3 (aldose reductase) [Source:MGI Symbol;Acc:MGI:1353494]                                                                     |
| Atp5k       | 347,388   | 160,9           | -1,11039  | 5,00E-05 | ATP synthase, H+ transporting, mitochondrial F1F0 complex, subunit e [Source:MGI Symbol;Acc:MGI:106636]                                                            |
| Cdkn2d      | 32,7406   | 14,9265         | -1,13321  | 1,00E-04 | cyclin-dependent kinase inhibitor 2D (p19, inhibits CDK4) [Source:MGI Symbol;Acc:MGI:105387]                                                                       |
| Tnfrsf8     | 15,4048   | 6,72892         | -1,19494  | 0,00015  | tumor necrosis factor, alpha-induced protein 8 [Source:MGI Symbol;Acc:MGI:2147191]                                                                                 |
| Usp17la     | 6,86756   | 2,97834         | -1,20529  | 2,00E-04 | ubiquitin specific peptidase 17-like A [Source:MGI Symbol;Acc:MGI:107699]                                                                                          |
| Dab2ip      | 3,05626   | 1,30815         | -1,22424  | 2,00E-04 | disabled 2 interacting protein [Source:MGI Symbol;Acc:MGI:1916851]                                                                                                 |
| Rplp2       | 1458,64   | 583,381         | -1,32211  | 3,00E-04 | ribosomal protein, large P2 [Source:MGI Symbol;Acc:MGI:1914436]                                                                                                    |
| Rpl26       | 269,924   | 107,829         | -1,32381  | 5,00E-05 | ribosomal protein L26 [Source:MGI Symbol;Acc:MGI:106022]                                                                                                           |
| Trib3       | 37,9265   | 15,0973         | -1,32891  | 5,00E-05 | tribbles homolog 3 (Drosophila) [Source:MGI Symbol;Acc:MGI:1345675]                                                                                                |
| Layn        | 8,11526   | 3,22519         | -1,33125  | 5,00E-05 | layilin [Source:MGI Symbol;Acc:MGI:2685357]                                                                                                                        |
| Gdf15       | 11,0194   | 4,33143         | -1,34712  | 0,00055  | growth differentiation factor 15 [Source:MGI Symbol;Acc:MGI:1346047]                                                                                               |
| Ddit4       | 7,93632   | 2,90396         | -1,45045  | 2,00E-04 | DNA-damage-inducible transcript 4 [Source:MGI Symbol;Acc:MGI:1921997]                                                                                              |
| Klf15       | 4,08803   | 1,3104          | -1,6414   | 0,00045  | Kruppel-like factor 15 [Source:MGI Symbol;Acc:MGI:1929988]                                                                                                         |
| Chac1       | 19,1486   | 5,94093         | -1,68848  | 5,00E-05 | ChaC, cation transport regulator 1 [Source:MGI Symbol;Acc:MGI:1916315]                                                                                             |
| Gm5611      | 21,5466   | 6,399           | -1,75154  | 5,00E-05 | predicted gene 5611 [Source:MGI Symbol;Acc:MGI:3647121]                                                                                                            |
| Phex        | 0,737842  | 0,202192        | -1,86759  | 7,00E-04 | phosphate regulating gene with homologies to endopeptidases on the X chromosome (hypophosphatemia, vitamin D resistant rickets) [Source:MGI Symbol;Acc:MGI:107489] |
| SH2d3c      | 2,28625   | 0,618298        | -1,88661  | 5,00E-05 | SH2 domain containing 3C [Source:MGI Symbol;Acc:MGI:1351631]                                                                                                       |
| Gm14323     | 5,46775   | 0,883133        | -2,63024  | 7,00E-04 | predicted gene 14323 [Source:MGI Symbol;Acc:MGI:3650742]                                                                                                           |
| Abcg1       | 1,03044   | 0,160843        | -2,67954  | 1,00E-04 | ATP-binding cassette, sub-family G (WHITE), member 1 [Source:MGI Symbol;Acc:MGI:107704]                                                                            |
| Gm14414     | 6,22852   | 0,943767        | -2,72239  | 4,00E-04 | predicted gene 14414 [Source:MGI Symbol;Acc:MGI:3652253]                                                                                                           |
| Gm12033     | 24,1417   | 0,757299        | -4,99452  | 5,00E-05 | predicted gene 12033 [Source:MGI Symbol;Acc:MGI:3650772]                                                                                                           |
| Rab42       | 0,294648  | 0               | -Inf      | 7,00E-04 | RAB42, member RAS oncogene family [Source:MGI Symbol;Acc:MGI:2441753]                                                                                              |
| Rps19-ps2   | 5,04479   | 0               | -Inf      | 5,00E-05 | ribosomal protein S19, pseudogene 2 [Source:MGI Symbol;Acc:MGI:3647073]                                                                                            |
| Rps19-ps1   | 5,04479   | 0               | -Inf      | 5,00E-05 | ribosomal protein S19, pseudogene 1 [Source:MGI Symbol;Acc:MGI:3782508]                                                                                            |
